# Association of Mannose-Binding Lectin Polymorphisms with Sepsis and Fatal Outcome, in Patients with Systemic Inflammatory Response Syndrome

Peter Garred,<sup>1</sup> Jens J. Strøm,<sup>2</sup> Lars Quist,<sup>2</sup> Ellen Taaning,<sup>3</sup> and Hans O. Madsen<sup>1</sup>

<sup>1</sup>Department of Clinical Immunology, Rigshospitalet, Copenhagen University Hospital, and Departments of <sup>2</sup>Anaesthesiology and <sup>3</sup>Clinical Immunology and Blood Bank, Glostrup University Hospital, Copenhagen, Denmark

**Genetic factors may predispose critically ill patients to increased risk of developing sepsis. Mannose-binding lectin (MBL) is an important factor in innate immune defense. We investigated whether MBL gene polymorphisms causing low levels of MBL are associated with the development and progression of sepsis in adult patients in intensive care units. In 272 prospectively monitored patients with systemic inflammatory response syndrome, different MBL genotypes were compared, with respect to microbiology, sepsis development, and survival. The presence of MBL variant alleles was associated with the development of sepsis, severe sepsis, and septic shock. An increased risk of fatal outcome was observed in patients carrying variant alleles. These data show that MBL insufficiency plays an important role in the susceptibility of critically ill patients to the development and progression of sepsis and confers a substantial risk of fatal outcome.**

Systemic inflammatory response syndrome (SIRS) is associated with different overlapping scenarios, comprising invasive infection, dissemination of microbes secondary to injury, shock, and activation of inflammation by apparently noninfectious events [1]. SIRS can be self-limiting or can, in infected patients, progress to severe sepsis and septic shock [2]. Severe sepsis is a primary cause of death in intensive care units (ICUs) (responsible for 30%–50% of deaths) [3].

Failure of host defense mechanisms is likely to be involved in the variable presentation of SIRS and sepsis. Although the pathophysiology of SIRS and sepsis is very complex, it has been shown that genetic factors of importance for the inflammatory response—such as polymorphisms associated with regulation of the expression

of tumor necrosis factor- $\alpha$  and interleukin-1 receptor antagonist gene—may be associated with susceptibility to and outcome of severe sepsis [4, 5]. In addition, genetic variation within the fibrinolytic system seems to be of importance for the outcome of sepsis [6–8].

Mannose-binding lectin (MBL) is a circulating liver-synthesized serum protein of importance for innate immune defense and is one of the recognition molecules in the lectin complement activation pathway (for a recent review, see [9]). Human MBL is derived from a single gene located on chromosome 10 (*mbl2*) [10, 11]. Interindividual differences in concentrations of MBL serum are mainly caused by structural variant alleles (*B*, *C*, and *D*, at codons 54, 57, and 52, respectively) in the *mbl2* gene [12–14]. The normal allele is named *A*, and the common designation for the variant alleles is *0*. In addition to the structural allele variants, differences in levels of MBL serum are determined by polymorphic sites in the promoter region of the *mbl2* gene [15, 16]. In particular, a base substitution at codon –221 (G→C; promoter allele *X*) is associated with low concentrations of MBL serum [15, 16].

MBL deficiency is associated with increased risk of

Received 14 February 2003; accepted 21 May 2003; electronically published 15 October 2003.

Financial support: Danish Medical Research Council; Novo Nordisk Foundation. Reprints or correspondence: Dr. Peter Garred, Tissue Typing Laboratory-7631, Dept. of Clinical Immunology, Rigshospitalet, Blegdamsvej 9, 2100 Copenhagen Ø, Denmark (Garred@post5.tele.dk).

**The Journal of Infectious Diseases** 2003;188:1394–403

© 2003 by the Infectious Diseases Society of America. All rights reserved. 0022-1899/2003/18809-0017\$15.00

**Table 1. Primer and interpretation of mannose-binding lectin (MBL) polymerase chain reaction (PCR) sequence-specific priming.**

| Reaction | Name of allele | Primer                    |                             | PCR product, bp | Haplotypes/interpretation |       |      |       |      |      |      |
|----------|----------------|---------------------------|-----------------------------|-----------------|---------------------------|-------|------|-------|------|------|------|
|          |                | Forward                   | Reverse                     |                 | LXPA                      | LYP A | LYQA | HYP A | LYPB | LYQC | HYPD |
| 1        | A non-B        | AGTCGACCCAGATTGTAGGACAGAG | CCTTTTCTCCCTTGGTGC          | 277             | x                         | x     | x    | x     |      | w    | x    |
| 2        | B              | GCAAAGATGGGCGTGATGA       | GGGCTGGCAAGACAATA           | 224             |                           |       |      |       | x    |      |      |
| 3        | A non-C        | AGTCGACCCAGATTGTAGGACAGAG | CCTGGTTCCCTTTTCTC           | 287             | x                         | x     | x    | x     | x    | x    | x    |
| 4        | C              | AGTCGACCCAGATTGTAGGACAGAG | ACCTGGTTCCCTTTTCTT          | 288             |                           |       |      |       |      | x    |      |
| 5        | A non-D        | AGTCGACCCAGATTGTAGGACAGAG | TCCCTTGGTGCCATCACG          | 270             | x                         | x     | x    | x     | x    | x    | x    |
| 6        | D              | AGTCGACCCAGATTGTAGGACAGAG | CTCCCTTGGTGCCATCAC A        | 271             |                           |       |      |       |      |      | x    |
| 7        | X              | CATTTGTTCTCACTGCCACC      | CTCAGGGAAGGTTAATCTCAG       | 285             | x                         |       |      |       |      |      |      |
| 8        | Y              | CATTTGTTCTCACTGCCACG      | CTCAGGGAAGGTTAATCTCAG       | 285             |                           | x     | x    | x     | x    | x    | x    |
| 9        | H              | GGCTTAGACCTATGGGGCTA      | GCTTCCCTTGGTGTTTAC          | 272             |                           |       |      | x     |      |      | x    |
| 10       | L              | GGCTTAGACCTATGGGGCTA      | GCTTCCCTTGGTGTTTAC          | 272             | x                         | x     | x    |       | x    | x    |      |
| 11       | P              | TAGGACAGAGGGCATGCTC       | AGGATCCAGGCAGTTTCTCT-GGAAGG | 334             | x                         | x     |      | x     | x    |      | x    |
| 12       | Q              | TAGGACAGAGGGCATGCTT       | AGGATCCAGGCAGTTTCTCT-GGAAGG | 334             |                           |       | x    |       |      | x    |      |
| Control  | MBL exon 4     | GAGTTTACCACCTTTTTCACA     | GCCTGAGTGATGACCCTTC         | 421             |                           |       |      |       |      |      |      |

**NOTE.** LYPB/LYQC heterozygotes give a weak signal in reaction 1; LYPB/HYPD heterozygotes give a weak signal in reaction 5; reactions 1 and 2, 3 and 4, 5 and 6, 7 and 8, 9 and 10, and 11 and 12 are complementary. w, weak signal; x, presence of specific PCR product.

infections during early childhood, especially during the first 6–18 months of life [17], and in patients with a concomitant immunodeficiency [18–21]. In addition, several studies have suggested that MBL variant alleles may be weakly associated with autoimmune conditions, such as systemic lupus erythematosus (for a comprehensive meta-analysis, see [22]) and progression of rheumatoid arthritis [23]. However, the importance

of MBL as a susceptibility and modifying factor, for the development of sepsis, is unknown.

In the present study, we have investigated, in patients admitted to an academic, multidisciplinary ICU, (1) whether MBL variant alleles confer increased risk of sepsis, severe sepsis, and septic shock in patients with SIRS and (2) whether MBL variant alleles are associated with fatal outcome.

**Table 2. Clinical diagnoses at admission to the intensive care unit and positive culture isolates, in 272 consecutive patients with systemic inflammatory response syndrome.**

| Diagnoses                                | Nonoperative medical diagnoses | Positive isolates | Postoperative surgical diagnoses | Positive isolates |
|------------------------------------------|--------------------------------|-------------------|----------------------------------|-------------------|
| A. 4 Congestive heart failure            | 6 (3.4)                        | 0                 |                                  |                   |
| B. 15 Pneumonia                          | 69 (38.8)                      | 53 (76.8)         |                                  |                   |
| B. 16 COPD acute deterioration           | 27 (15.2)                      | 8 (29.6)          |                                  |                   |
| Epiglottitis                             | 7 (3.9)                        | 2 (28.6)          |                                  |                   |
| L. 55 Respiratory infection              |                                |                   | 39 (41.5)                        | 19 (48.7)         |
| C. 21 Hepatic failure                    | 3 (1.7)                        | 2 (66.7)          |                                  |                   |
| C. 24 G-I inflammatory disease           | 4 (2.2)                        | 3 (75.0)          |                                  |                   |
| M.59 G-I perforation/rupture/peritonitis |                                |                   | 29 (30.9)                        | 7 (24.1)          |
| D. 30 Stroke                             | 3 (1.7)                        | 2 (66.7)          |                                  |                   |
| D. 31 CNS infection                      | 7 (3.9)                        | 4 (57.1)          |                                  |                   |
| D. 33 Neuromuscular                      | 3 (1.7)                        | 3 (100.0)         |                                  |                   |
| D. 34 Seizure (status)                   | 5 (2.8)                        | 4 (80.0)          |                                  |                   |
| E. 37 Urosepsis                          | 12 (6.7)                       | 11 (91.7)         |                                  |                   |
| F. 39 Trauma                             | 6 (3.4)                        | 1 (16.7)          |                                  |                   |
| O.74 Trauma                              |                                |                   | 20 (21.3)                        | 5 (25.0)          |
| G. 41 Ketoacidosis                       | 8 (4.5)                        | 5 (62.5)          |                                  |                   |
| G. 42 Major intoxication                 | 13 (7.3)                       | 5 (38.5)          |                                  |                   |
| Other                                    | 5 (2.8)                        | 2 (40.0)          | 6 (6.4)                          | 0                 |
| Total                                    | 178 (100.0)                    | 105 (60.0)        | 94 (100.0)                       | 31 (33.0)         |

**NOTE.** Data are no. (%) of patients. Percentages of positive isolates are percentage of number from the column to the left. Nonoperative medical (no surgery within last 7 days) and postoperative surgical (surgery within last 7 days) diagnoses at admittance, according to the APACHE III diagnosis list for critically ill hospitalized adults [30]. Letters and numbers in the first column refer to the APACHE III diagnosis list. CNS, central nervous system; COPD, chronic obstructive pulmonary disease; G-I, gastrointestinal.

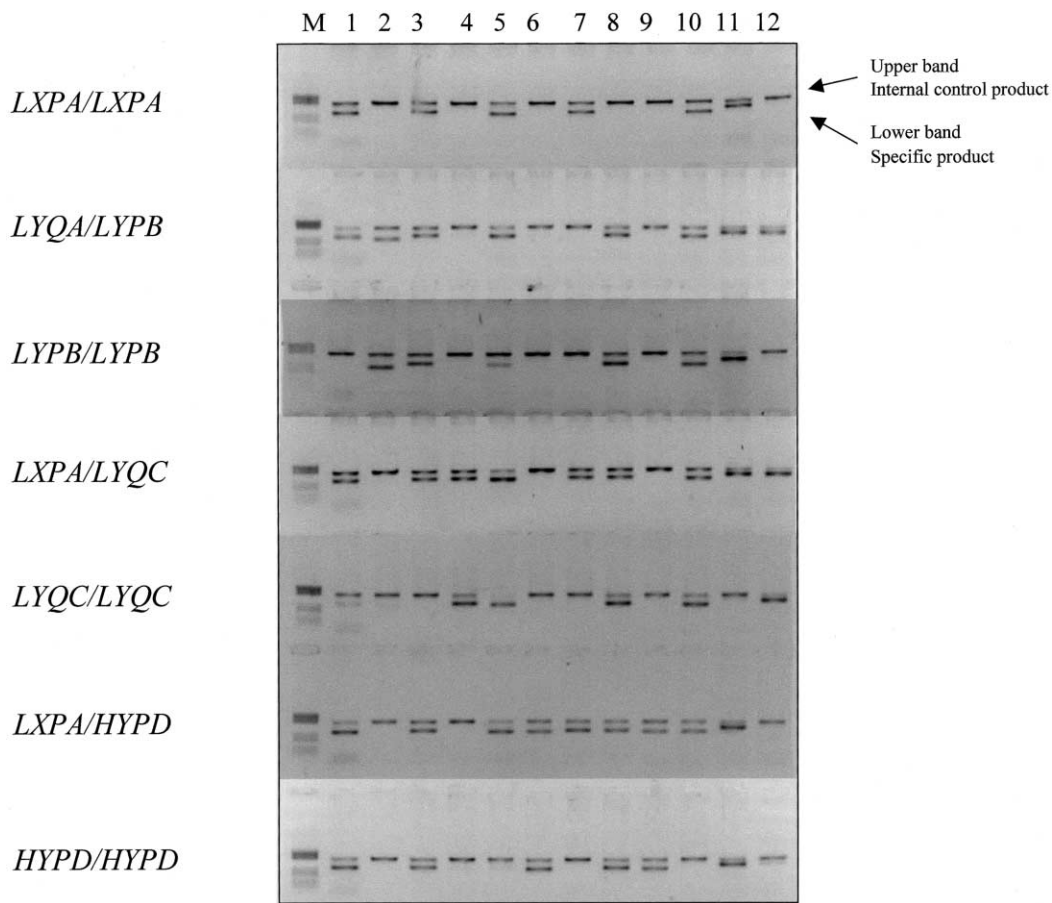

**Figure 1.** Mannose-binding lectin (MBL) genotyping pattern. MBL genotyping by polymerase chain reaction (PCR) sequence-specific priming. The nos. 1–12 indicate the PCRs listed in table 1. For a detailed description, see Patients and Methods. M, molecular weight marker pBR327/HaeIII.

## PATIENTS AND METHODS

From February 1998 to July 1999, all patients >17 years old (range, 18–88 years; 132 women and 140 men) admitted to the academic, multidisciplinary ICU at Glostrup University Hospital, in Copenhagen, Denmark, who met the criteria for SIRS, as outlined by Bone et al. [24], were included in the study. The protocol was approved by the local ethics committee, in the County of Copenhagen. Informed consent was obtained from the patients or from their relatives. The criteria for SIRS and sepsis diagnosis used in this study are outlined in the appendix. Information about death during follow-up, during February 2002, was obtained from the Danish Central Office of Civil Registration. A total of 190 blood donors and 60 members of the hospital staff served as healthy control subjects [16].

**Simplified acute physiology score II (SAPS II) and mortality prediction.** SAPS II is based on a large international sample of medical and surgical patients and provides an estimate of the risk of fatal outcome, without having to specify a diagnostic category [25]. The “worst values” (specifically outlined in the

SAPS II scoring method) within the first 24 h after admission to the ICU were recorded.

**Detection of concentrations and genotypes of MBL protein.** Concentrations of MBL in serum were measured in a double-enzyme immunoassay, as described elsewhere [26]. The assay preferentially detects fully oligomerized MBL. MBL single-nucleotide polymorphisms (SNPs)—in the form of the structural variants named *B* (codon 54), *C* (codon 57), and *D* (codon 52), as well as the regulatory variants named *H/L* (–550), *X/Y* (–221), and *P/Q* (+4)—were typed by polymerase chain reaction (PCR) using sequence-specific priming, which includes the 12 reactions listed in table 1. We included a PCR accounting for exon 4 of the *mb12* gene as an internal positive control. The PCR analysis was performed essentially as described elsewhere [27], except that the concentration of dNTPs was reduced to 0.7 mM, and the PCR products were analyzed by a 2% agarose gel electrophoresis. Figure 1 shows the 7 patterns necessary to account for all combinations of each of the 6 complementary reactions. The typing system was validated by automated sequencing (ABI 3100 platform) of PCR products from the 7

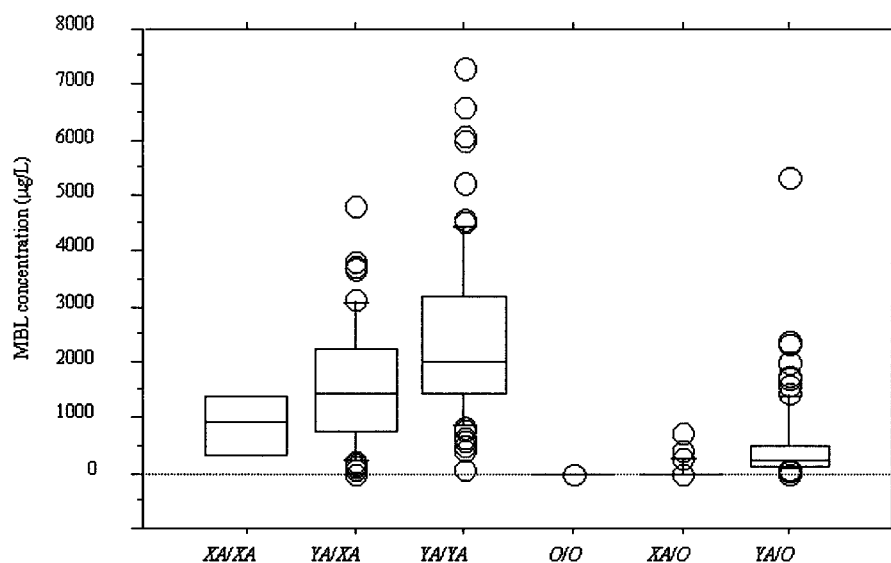

**Figure 2.** Relationship between concentrations of mannose-binding lectin (MBL) serum and MBL genotypes. Concentrations of oligomerized MBL in serum from 272 patients with systemic inflammatory response syndrome are shown in relation to MBL structural alleles (*O*), as well as the MBL promoter alleles at position  $-221$  (*X/Y*). Ranges, quartiles, and medians are indicated. The detection limit of the assay was  $20 \mu\text{g/L}$ .

control samples accounting for all the polymorphic positions and, in addition, by comparing the typing system with the typing techniques used elsewhere [16]. Although the typing was performed as SNP typing, the results were combined in haplotypes, on the basis of strong linkage disequilibrium between the SNPs, which results in the 7 known haplotypes: 4 functional haplotypes (*LXPA*, *LYPA*, *LYQA*, and *HYP A*; the normal allele is designated “A”) and 3 defective haplotypes (*LYPB*, *LYQC*, and *HYPD*) [16]. All 3 structural variant alleles (*B*, *C*, and *D*) have a considerable effect on MBL concentrations, and, to avoid small groups, the 3 alleles were grouped in 1 category, called “allele” (*O*), for statistical analyses. Likewise, for statistical analyses, we only included the *X/Y* promoter variation at position  $-221$ . The *X* variant is always found on a functional haplotype (*LXPA*) and has been shown to have a down-regulating effect on MBL expression [16,28]. Thus, the following 6 MBL genotypes/haplotypes were defined: the *A/A* group: 2 normal structural alleles with high-expression promoter activity at position  $-221$  (*YA/YA*), 1 high-expression promoter and 1 low-expression promoter (*YA/XA*), or 2 low-expression promoters (*XA/XA*); the *A/O* group: 1 variant structural allele (i.e., defective allele) and 1 normal structural allele, regulated by a high-expression promoter (*YA/O*) or a low-expression promoter (*XA/O*); and the *O/O* group: 2 defective structural alleles.

**Statistical analyses.** Contingency table analyses and trend analyses were used to compare frequencies. Kruskal-Wallis or Mann-Whitney tests were used to compare continuous data. When appropriate, logistic-regression analyses were used to investigate for possible confounders. The SAPS II scores were

converted into a prediction of mortality, as described elsewhere [25]. To create a current risk of fatal outcome for the present data set, the SAPS II scores were calibrated to the actual mortality, by use of receiver operating characteristic curve analysis and goodness-of-fit tests [29].

## RESULTS

Of the 272 patients with SIRS enrolled in the present study, 197 (72.4%) met the criteria for sepsis, either at admission or during the first 24 h in the ICU. Nonoperative (medical) and postoperative (surgical) diagnoses at admission, according to the APACHE III diagnosis list for critically ill, hospitalized adults [30], are outlined in table 2. The distribution of the concentrations of MBL serum was closely associated with the different MBL genotypes (figure 2) ( $P < .001$ ). The frequency of MBL genotypes did not deviate significantly between patients with SIRS and healthy control subjects (table 3). At admission to the ICU, 133 (49%) patients had an infectious, related diagnosis given by the referring physician. In this group of patients, MBL variant alleles were significantly increased, compared with those in patients with a noninfectious, related diagnosis at admission ( $\chi^2$  test [2 *df*];  $P < .014$ ).

Of the 197 patients with sepsis, 171 (86.8%) met the criteria for severe sepsis (table 4). Furthermore, 70 (40.9%) of these patients met the criteria for septic shock. Stratification of the patients, according to MBL genotypes, revealed that a highly significant proportion of the patients with sepsis carried MBL

**Table 3. Mannose-binding lectin (MBL) genotypes in healthy control subjects versus all patients with systemic inflammatory response syndrome admitted to an intensive care unit.**

| Allele, genotype                       | Control subjects | All patients |
|----------------------------------------|------------------|--------------|
| Structural alleles <sup>a</sup>        |                  |              |
| Sum A/A                                | 157 (62.8)       | 151 (55.5)   |
| A/B                                    | 48 (19.2)        | 59 (21.7)    |
| A/C                                    | 13 (5.2)         | 8 (2.9)      |
| A/D                                    | 25 (10.0)        | 40 (14.7)    |
| Sum A/O                                | 86 (34.4)        | 107 (39.3)   |
| B/B                                    | 3 (1.2)          | 5 (1.8)      |
| B/D                                    | 3 (1.2)          | 7 (2.6)      |
| D/D                                    | 1 (0.4)          | 2 (0.7)      |
| Sum O/O                                | 7 (2.8)          | 14 (5.1)     |
| Total                                  | 250 (100.0)      | 272 (100.0)  |
| Promoter alleles included <sup>b</sup> |                  |              |
| YA/YA                                  | 72 (28.8)        | 83 (30.5)    |
| YA/XA                                  | 73 (29.2)        | 65 (23.9)    |
| XA/XA                                  | 12 (4.8)         | 3 (1.1)      |
| Sum A/A                                | 157 (62.8)       | 151 (55.5)   |
| YA/O                                   | 53 (21.2)        | 82 (30.1)    |
| XA/O                                   | 33 (13.2)        | 25 (9.2)     |
| Sum A/O                                | 86 (34.4)        | 107 (39.3)   |
| Sum O/O                                | 7 (2.8)          | 14 (5.1)     |
| Total                                  | 250 (100.0)      | 272 (100.0)  |

**NOTE.** Data are no. (%) of subjects. Control subjects versus patients (A/A vs. A/O plus O/O). Y and X indicate base exchanges at codon -221, which profoundly influence the expression of MBL. X is present only on A chromosomes. A, normal structural allele; O, variant alleles (B, codon 54; C, codon 57; and D, codon 52).

<sup>a</sup>  $\chi^2$  test for linear trend, 3.67 ( $P = .06$ ).

<sup>b</sup>  $\chi^2$  test for linear trend, 0.51 ( $P = .47$ ).

variant alleles, compared with the patients without sepsis (table 4) ( $P < .001$ ). Further analyses showed that patients carrying MBL variant alleles also had a high risk of developing severe sepsis and septic shock ( $P < .001$ ).

When the promoter alleles were taken into account, there was a striking linear trend in susceptibility to sepsis, severe sepsis, and development of septic shock, from the highest-expressing MBL genotypes to genotypes encoding MBL deficiency, compared with that for patients with SIRS without sepsis (table 4) ( $P < .001$ ). Moreover, an independent and significant association between the presence of MBL variant alleles (A/A vs. A/O plus O/O) and sepsis ( $n = 26$ ) was observed when the patients with severe sepsis and septic shock were excluded from the analysis ( $\chi^2$  test, 4.77 [1 df];  $P = .028$ ) and also when patients with septic shock were excluded from the analysis of the severe-sepsis group ( $n = 101$ ) ( $\chi^2$  test, 5.25 [1 df];  $P = .022$ ). Likewise, the association was also seen when comparing patients with SIRS with sepsis with healthy control subjects ( $\chi^2$  test for linear trend, 10.8;  $P = .001$ ) (tables 3 and 4).

A gradual decrease in concentrations of MBL serum was seen with increased severity of sepsis (SIRS, sepsis, severe sepsis, and shock) ( $P = .0032$ , Kruskal-Wallis), which was in full accordance with the data on genotype. Age was a significant risk

factor for developing sepsis ( $P = .03$ , logistic regression). However, when a logistic-regression model was used, the risk of developing sepsis in patients carrying MBL variant alleles was independent of age ( $P < .001$ ).

Specimens obtained immediately before or at admission to the ICU were culture positive for 50% of the patients (table 5). The microbiological spectrum was wide, and no infectious agent was predominant. However, a significantly increased proportion of the patients carrying MBL variant alleles were culture positive in a gene dose-dependent manner ( $P = .012$ ). It is noteworthy that MBL deficiency was associated with both gram-negative and gram-positive bacteria, but an association with fungal infections was less certain.

In total, 83 (30.5%) of the patients died while admitted to hospital (table 6). Among these patients, 25.8% of those with the normal genotype, 34.6% with the heterozygous genotype, and 50.0% with the homozygous defective genotype died during the in-hospital period ( $\chi^2$  test for linear trend, 4.7;  $P = .030$ ) (table 6). Inclusion of the MBL promoter alleles suggested that those patients with the highest levels of MBL (YA/YA) were the most protected against fatal outcome ( $\chi^2$  test for linear trend, 4.7;  $P = .030$ ) (table 6). It should be noted that an increased risk of fatal outcome, for patients carrying MBL variant alleles, was present in both the sepsis group and the non-sepsis group, but neither was significant at the 5% level. Also, a reduced concentration of MBL serum was observed in the nonsurvivor group, compared with that in the survivor group (mean  $\pm$  SD, 997  $\pm$  1225 and 1398  $\pm$  1456  $\mu$ g/L, respectively;  $P = .020$ ).

No significant differences in the parameters underlying the SAPS II score, the crude SAPS II score, and the predicted standardized mortality rate (observed mortality divided by predicted mortality), on the basis of the SAPS II score, were observed when stratified according to MBL genotypes (table 7) ( $P > .05$ ), nor was there any significant association between increasing numbers of SIRS criteria (2 to 4) and the MBL genotypes. Separating age score from SAPS II score revealed that, when tested by logistic regression, the association between the MBL genotypes and fatal outcome was independent of both the age score and the acute physiology score (APS) ( $P = .025$ , for MBL genotypes;  $P < .001$ , for age and APS).

During the follow-up period, an additional 68 patients died (mean follow-up time, 30.3 months). During this period, no significant overall association was seen between MBL variant alleles and fatal outcome ( $\chi^2$  test for trend, 0.22;  $P = .64$ ).

## DISCUSSION

Numerous factors are involved in controlling and limiting localized infections. In general, the septic response occurs when

**Table 4. Mannose-binding lectin genotypes, structural alleles, comparisons of patients without sepsis and those with sepsis, and severe sepsis and septic shock, in patients with systemic inflammatory response syndrome.**

| Allele, genotype                 | No. (%) of patients |             |                    |                   | Risk ratio (95% CI) <sup>a</sup> |                  |                  |
|----------------------------------|---------------------|-------------|--------------------|-------------------|----------------------------------|------------------|------------------|
|                                  | Without sepsis      | With sepsis | With severe sepsis | With septic shock | Sepsis                           | Severe sepsis    | Septic shock     |
| <b>Structural alleles</b>        |                     |             |                    |                   |                                  |                  |                  |
| Sum A/A                          | 55 (73.3)           | 96 (48.7)   | 83 (48.5)          | 31 (44.3)         | 1                                | 1                | 1                |
| A/B                              | 9 (12.0)            | 50 (25.4)   | 45 (26.3)          | 14 (20.0)         |                                  |                  |                  |
| A/C                              | 2 (2.7)             | 6 (3.1)     | 5 (2.9)            | 3 (4.3)           |                                  |                  |                  |
| A/D                              | 9 (12.0)            | 31 (15.7)   | 26 (15.2)          | 13 (18.6)         |                                  |                  |                  |
| Sum A/O                          | 20 (26.7)           | 87 (44.2)   | 76 (44.4)          | 30 (42.9)         | 1.28 (1.1–1.49)                  | 1.32 (1.11–1.56) | 1.66 (1.16–2.39) |
| B/B                              | 0                   | 5 (2.5)     | 4 (2.3)            | 3 (4.3)           |                                  |                  |                  |
| B/D                              | 0                   | 7 (3.6)     | 6 (3.5)            | 4 (5.7)           |                                  |                  |                  |
| D/D                              | 0                   | 2 (1.0)     | 2 (1.2)            | 2 (2.9)           |                                  |                  |                  |
| Sum O/O                          | 0                   | 14 (7.1)    | 12 (7.0)           | 9 (12.9)          | 1.57 (1.39–1.77)                 | 1.66 (1.45–1.9)  | 2.77 (2.09–3.68) |
| Total                            | 75 (100.0)          | 197 (100.0) | 171 (100.0)        | 70 (100.0)        |                                  |                  |                  |
| <b>Promoter alleles included</b> |                     |             |                    |                   |                                  |                  |                  |
| YA/YA                            | 31 (41.3)           | 52 (26.4)   | 45 (26.3)          | 14 (20.0)         | 1                                | 1                | 1                |
| YA/XA                            | 24 (32.6)           | 41 (20.8)   | 36 (21.1)          | 17 (24.3)         | 1.01 (0.78–1.29)                 | 1.01 (0.77–1.34) | 1.33 (0.76–2.35) |
| XA/XA                            | 0                   | 3 (1.5)     | 2 (1.2)            | 0                 | 1.60 (1.35–1.88)                 | 1.69 (1.40–2.04) | NA               |
| YA/O                             | 17 (22.7)           | 65 (33.0)   | 55 (32.2)          | 21 (30.0)         | 1.27 (1.04–1.54)                 | 1.29 (1.03–1.62) | 1.78 (1.06–2.99) |
| XA/O                             | 3 (4.0)             | 22 (11.2)   | 21 (12.3)          | 9 (12.9)          | 1.40 (1.13–1.75)                 | 1.48 (1.16–1.88) | 2.41 (1.40–4.15) |
| O/O                              | 0                   | 14 (7.1)    | 12 (7.0)           | 9 (12.9)          | 1.60 (1.35–1.88)                 | 1.69 (1.40–2.04) | 3.21 (2.08–4.96) |

**NOTE.** CI, confidence interval.

<sup>a</sup> A/A vs. A/O plus O/O.  $\chi^2$  for linear trend, <15.1 ( $P < .001$ ).

<sup>b</sup>  $\chi^2$  for linear trend, <15.8 ( $P < .001$ ).

immune defenses fail to contain an invading microbe. Deficiencies in nonadaptive, innate host factors have been suggested to be of particular importance [3], but, so far, the epidemiological proof of such a notion has been limited. The present study has indicated that functional MBL is important for avoiding the development of sepsis and septic shock in critically ill patients. We have found that patients with SIRS have a high risk of developing sepsis, provided that they carry variant alleles in the *mb12* gene, which decrease the level of functional MBL in the blood. Although not as prominent, the same difference was observed when we compared patients with sepsis and healthy control subjects. Thus, MBL seems to be involved in controlling systemic dissemination of different infectious agents in patients with acute medical and surgical stress. This observation is in agreement with the finding that a significantly increased proportion of patients carrying MBL variant alleles also had a positive culture for microbial species.

In general, MBL exerts its largest effect during the vulnerable window of infancy, especially during the first 6–18 months of life [17]. Nevertheless, MBL deficiency has been associated with a number of infections, particularly in patients with concomitant immunodeficiencies [18–21]. It is conceivable that the initial SIRS insult creates a precondition rendering the patient partly immunocompromised. This increases the patient's susceptibility to infection, thereby exposing the clinical MBL phenotype. The necessity that an accompanying condition should

be present before MBL deficiency becomes clinically important has recently been indicated in relation to pneumococcal pneumonia. In unselected patients, a variable association is seen [31, 32], whereas, in selected patients with a concomitant disorder, a clear association is seen [19, 22].

The finding that the frequency of MBL variant alleles increases with severity of sepsis (severe sepsis and septic shock) indicates that the lack of buffering capacity in MBL, toward initial microbial replication, not only is associated with susceptibility to infection, but also may allow the activation of host mechanisms central to the pathophysiology of the sepsis syndrome. Consistent with this view are several in vitro findings indicating that MBL may suppress the release of proinflammatory cytokines [33, 34]. Thus, MBL may both play a direct antimicrobial role and have a modulating effect on the inflammatory response. In a recent study, MBL has been shown to function as a scavenger molecule toward cells undergoing processes of apoptosis [35] and necrosis [36]. Dysfunctional handling of dying host cells could be of importance for the pathophysiology of sepsis, and lack of functional MBL could theoretically, by such a mechanism, become clinically relevant for the progression of the sepsis syndrome.

During hospital stay, an increased risk of fatal outcome was observed in the patients carrying MBL variant alleles. By contrast, no such association was observed during the 30 months of follow-up, indicating that the increased risk of fatal outcome

**Table 5. Nos. of patients and microbial species diagnosed in cultures obtained at admission (day -3 to +1) to intensive care unit, in 272 consecutive patients with systemic inflammatory response syndrome.**

| Patient or microorganism        | Total      | A/A                    | A/O                    | O/O                    |
|---------------------------------|------------|------------------------|------------------------|------------------------|
| <b>Patient</b>                  |            |                        |                        |                        |
| Sum positive                    | 136 (50.0) | 68 (45.0) <sup>a</sup> | 56 (52.3) <sup>a</sup> | 12 (85.7) <sup>a</sup> |
| Sum negative or unknown         | 136 (50.0) | 83 (55.0) <sup>a</sup> | 51 (47.7) <sup>a</sup> | 2 (14.3) <sup>a</sup>  |
| Total                           | 272        | 151                    | 107                    | 14                     |
| <b>Microorganisms</b>           |            |                        |                        |                        |
| Gram positive                   | 65 (47.7)  | 34 (50.0)              | 25 (44.6)              | 6 (50.0)               |
| <i>Staphylococcus aureus</i>    | 21 (32.3)  | 11 (32.4)              | 9 (36.0)               | 1 (16.7)               |
| <i>Streptococcus pneumoniae</i> | 17 (26.2)  | 8 (23.5)               | 6 (24.0)               | 3 (50.0)               |
| <i>Staphylococcus albus</i>     | 15 (23.0)  | 10 (29.4)              | 5 (20.0)               | 0                      |
| <i>Streptococcus faecalis</i>   | 6 (9.2)    | 1 (2.9)                | 4 (16.0)               | 1 (16.7)               |
| <i>Streptococcus pyogenes</i>   | 2 (3.1)    | 2 (5.9)                | 0                      | 0                      |
| Other gram positive             | 4 (6.2)    | 2 (5.9)                | 1 (4.0)                | 1 (16.7)               |
| Gram negative                   | 57 (41.9)  | 27 (39.7)              | 25 (44.6)              | 5 (41.7)               |
| <i>Escherichia coli</i>         | 24 (42.1)  | 10 (37.0)              | 10 (40.0)              | 4 (80.0)               |
| <i>Haemophilus influenzae</i>   | 13 (22.8)  | 6 (22.2)               | 7 (28.0)               | 0                      |
| <i>Klebsiella pneumoniae</i>    | 5 (8.8)    | 1 (3.7)                | 4 (16.0)               | 0                      |
| <i>Pseudomonas aeruginosae</i>  | 3 (5.3)    | 3 (11.1)               | 0                      | 0                      |
| <i>Serratia marcescens</i>      | 3 (5.3)    | 3 (11.1)               | 0                      | 0                      |
| <i>Branhamella catarrhalis</i>  | 3 (5.3)    | 2 (7.4)                | 1 (4.0)                | 0                      |
| Other gram negative             | 6 (10.6)   | 2 (7.4)                | 3 (12.0)               | 1 (20.0)               |
| <b>Fungi</b>                    |            |                        |                        |                        |
| <i>Candida albicans</i>         | 14 (10.3)  | 7 (10.3)               | 6 (10.7)               | 1 (8.3)                |

**NOTE.** A total of 173 cultures (40 from blood, 97 from trachea, 26 from urine, and 10 from other sources) obtained from 136 patients were found to be culture positive. A species appearing in >1 culture/patient was counted only once. A, normal structural allele; O, common designation for variant alleles (B, codon 54; C, codon 57; and D, codon 52)

<sup>a</sup>  $\chi^2$  test for linear trend, 6.02 ( $P = .012$ ).

was directly related to the actual pathological incidence. However, the close association between MBL deficiency and the development of sepsis, which was higher than the association between MBL deficiency and fatal outcome, suggests that MBL may influence processes related to initial steps in the disease process. Consistent with this view is the lack of association both between MBL variant alleles and the SAPS II score and between

MBL variant alleles and an increasing number of SIRS criteria. Both increased SAPS II score and increasing number of criteria are independently associated with the risk of fatal outcome [25]. In this regard, it is interesting that excessive activation of complement, which takes place in SIRS and sepsis, has been shown to be associated with fatal outcome [37]. Moreover, genetic complement deficiency and complement depletion have been shown to be beneficial in animal models of complement-dependent inflammation [38]. Thus, complement and, probably, MBL may play different roles during the course of the sepsis syndrome, which may explain why it is difficult to classify patients with SIRS with aberrations in their MBL genetic profile, in relation to prognosis. The possibility of confounding factors—for example, treatment given and duration of illness before admission to the ICU—that have not been revealed by us should also be considered.

We only included white patients of Danish origin. However, the ethnic-specific genetic constitution, as well as nongenetic factors, will vary in different studies. Thus, to establish the full effect that MBL deficiency has on the sepsis syndrome, these findings need to be replicated in other populations, as well as in settings with different microbial regimens and clinical surveillance regimens.

**Table 6. Manose-binding lectin genotypes in patients with systemic inflammatory response syndrome (comparison between survivors and nonsurvivors during stay at hospital).**

| Allele, genotype                 | Survivors   | Nonsurvivors | Risk ratio (95% CI) |
|----------------------------------|-------------|--------------|---------------------|
| <b>Structural alleles</b>        |             |              |                     |
| Sum A/A                          | 112 (59.3)  | 39 (47.0)    | 1                   |
| A/B                              | 38 (20.1)   | 21 (25.3)    |                     |
| A/C                              | 5 (2.6)     | 3 (3.6)      |                     |
| A/D                              | 27 (14.3)   | 13 (15.7)    |                     |
| Sum A/O                          | 70 (37.0)   | 37 (44.6)    | 1.34 (0.92–1.95)    |
| B/B                              | 4 (2.1)     | 1 (1.2)      |                     |
| B/D                              | 1 (0.5)     | 6 (7.2)      |                     |
| D/D                              | 2 (1.1)     | 0 (0.0)      |                     |
| Sum O/O                          | 7 (3.7)     | 7 (8.4)      | 1.94 (1.07–3.49)    |
| Total                            | 189 (100.0) | 83 (100.0)   |                     |
| <b>Promoter alleles included</b> |             |              |                     |
| YA/YA                            | 65 (34.4)   | 18 (21.7)    | 1                   |
| YA/XA                            | 44 (23.3)   | 21 (25.3)    | 1.49 (0.87–2.55)    |
| XA/XA                            | 3 (1.6)     | 0            | NA                  |
| YA/O                             | 53 (28.0)   | 29 (34.9)    | 1.63 (1.0–2.70)     |
| XA/O                             | 17 (9.0)    | 8 (9.6)      | 1.48 (0.7–2.98)     |
| O/O                              | 7 (3.7)     | 7 (8.4)      | 2.31 (1.19–4.48)    |
| Total                            | 189 (100.0) | 83 (100.0)   |                     |

**NOTE.** Data are no. (%) of subjects, unless otherwise noted.  $\chi^2$  test for linear trend, 4.7 ( $P = .030$ ). CI, confidence interval.

**Table 7. Simplified Acute Physiology Score (SAPS II) parameters and observed and predicted mortality in 272 patients with systemic inflammatory response syndrome (SIRS), classified by mannose-binding lectin structural variant alleles.**

| Variable                                         | Total<br>(n = 272) | A/A<br>(n = 151) | A/O<br>(n = 107) | O/O<br>(n = 14) |
|--------------------------------------------------|--------------------|------------------|------------------|-----------------|
| Age, mean ± SD, years                            | 60.2 ± 16.5        | 60.1 ± 16.7      | 60.7 ± 16.3      | 55.5 ± 17.8     |
| Type of admission                                |                    |                  |                  |                 |
| Acute surgery                                    | 86 (31.6)          | 51 (33.8)        | 33 (30.8)        | 2 (14.3)        |
| Elective surgery                                 | 8 (2.9)            | 5 (3.3)          | 3 (2.8)          | 0               |
| Medical <sup>a</sup>                             | 178 (65.4)         | 95 (62.9)        | 71 (66.4)        | 12 (85.7)       |
| Chronic disease <sup>b</sup>                     |                    |                  |                  |                 |
| AIDS                                             | 0                  | 0                | 0                | 0               |
| Metastatic cancer                                | 1                  | 1                | 0                | 0               |
| Hematological malignancy                         | 3                  | 3                | 0                | 0               |
| SAPS II                                          |                    |                  |                  |                 |
| SAPS II score, mean ± SD                         | 37.7 ± 15.4        | 36.8 ± 15.1      | 38.4 ± 16.3      | 42.1 ± 10.6     |
| Age, mean ± SD, points                           | 10.4 ± 5.4         | 10.4 ± 5.2       | 10.4 ± 5.7       | 10.1 ± 5.7      |
| Acute physiology, mean ± SD, points <sup>c</sup> | 27.2 ± 13.3        | 26.4 ± 12.7      | 28.0 ± 14.4      | 30.4 ± 11.2     |
| Mortality                                        |                    |                  |                  |                 |
| Mortality observed                               | 83 (30.5)          | 39 (25.8)        | 37 (34.6)        | 7 (50.0)        |
| Mortality predicted <sup>d</sup>                 | 83.0 (30.5)        | 44.6 (29.5)      | 33.4 (31.2)      | 5.0 (35.7)      |
| SMR, mean                                        | 1.00               | 0.87             | 1.11             | 1.40            |
| No. of SIRS criteria                             |                    |                  |                  |                 |
| 2                                                | 71 (26.1)          | 43 (28.5)        | 27 (25.2)        | 1 (7.1)         |
| 3                                                | 91 (33.5)          | 51 (33.8)        | 36 (33.6)        | 4 (28.6)        |
| 4                                                | 110 (40.4)         | 57 (37.7)        | 44 (41.1)        | 9 (64.3)        |

**NOTE.** Data are no. (%) of subjects, unless otherwise noted. A, normal structural allele; O, common designation of the variant alleles (B, codon 54; C, codon 57; and D, codon 52); SMR, standardized mortality rate (mortality observed/mortality predicted).

<sup>a</sup> Without surgery within last 7 days.

<sup>b</sup> Chronic disease is based on available information on day 1.

<sup>c</sup> Acute physiology score, combined score for heart rate, systolic blood pressure, temperature, white blood cell count, PaO<sub>2</sub>/FiO<sub>2</sub> ratio, urinary nitrogen, bilirubin, sodium, potassium, bicarbonate, diuresis, and Glasgow Coma Score.

<sup>d</sup> Predicted mortality after first-level customization (logit, -3.8084 + (0.0741 \* SAPS II). Continuous data was analyzed by Kruskal-Wallis test and categorical data by  $\chi^2$  test. Between the different MBL genotypes, none of the parameters deviated significantly ( $P > .05$ ).

In conclusion, the present study has shown that genetically determined differences in the MBL gene (*mb12*) explain a significant proportion of the inherited risk of developing sepsis in critically ill patients. MBL variant alleles were also associated with increased risk of fatal outcome. Accordingly, rapid determination of the MBL genotype could be important for identification of patients who are at risk for developing severe sepsis. Moreover, since MBL-substitution therapy is now possible [39], our data raise the prospect that MBL may be used in prophylaxis and treatment of the sepsis syndrome.

## Acknowledgments

We thank Bente Fredriksen and Vibeke Weirup, for excellent technical assistance, and the staff of the Intensive Care Unit and the staff of Department of Clinical Immunology and Blood Bank at Glostrup Hospital, for invaluable help and support.

## APPENDIX

### SUMMARY OF CLASSIFICATION CRITERIA (SIRS, SEPSIS, SEVERE SEPSIS, AND SEPTIC SHOCK)

Systemic inflammatory response syndrome (SIRS), sepsis, severe sepsis, and septic shock were defined in accordance with the recommendations of the American College of Chest Physicians/Society of Critical Care Medicine Consensus Conference [24]. Patients were required to meet  $\geq 2$  of the following 4 SIRS criteria: (1) a core temperature of  $\geq 38^\circ\text{C}$  or  $\leq 36^\circ\text{C}$ ; (2) a heart rate of  $>90$  beats/min; (3) a respiratory rate of  $\geq 20$  breaths/min, a PaCO<sub>2</sub> ratio of  $\leq 4.3$  kPa (32 mm Hg), or a need for mechanical ventilation; (4) or a white blood cell count of  $\geq 12.0 \times 10^9$  cells/L or  $\leq 4.0 \times 10^9$  cells/L or a differential count



showing >10% immature neutrophils. Subsequently, the criteria for sepsis was SIRS with a documented infection or a clinically suspected infection—such as postoperative intra-abdominal sepsis in which the intestinal tract either has been perforated or requires partial resection for ischemia, intestinal content appearing intra-abdominally due to a leak from prior gut anastomosis, and radiographic evidence of pneumonia in association with purulent sputum. Infection was documented by a positive culture or convincing Gram stain, obtained no more than 3 days before admission to the ICU. Severe sepsis was defined as sepsis and either hypotension or evidence of hypoperfusion and organ dysfunction, developing within 24 h of enrollment in the study. Patients were required to meet at least 1 of the following criteria to be defined as having organ dysfunction: (1) arterial systolic blood pressure of <90 mm Hg for at least 1 h, despite appropriate fluid resuscitation, or vasopressor therapy to maintain a systolic blood pressure >90 mm Hg; (2) urine output of <0.5 mL/kg for >1 h, despite hydration; (3) PaO<sub>2</sub>/FiO<sub>2</sub> ratio of ≤40 kPa (300 mm Hg); (4) an acute alteration in mental status (Glasgow Coma Score <14); (5) unexplained metabolic acidosis, with pH ≤7.30 or base deficit of ≥5.0 mM, in association with an increased level of plasma lactate of ≥1.6 mM; or (6) hepatobiliary dysfunction with serum bilirubin of >34 μM and no evidence of preexisting hepatobiliary disease.

Septic shock was defined as sepsis with hypotension in combination with 1 of the other criteria for acute organ dysfunction. Patients were excluded from participation if any of the following conditions were present: neutrophil count of <1.0 × 10<sup>9</sup> cells/L before the onset of sepsis, infections associated with burns, documented or suspected recent acute myocardial infarction, or lack of commitment to full life-support measures by the primary physician.

## References

- Rangel-Frausto MS, Pittet D, Costigan M, Hwang T, Davis CS, Wenzel RP. The natural history of the systemic inflammatory response syndrome (SIRS): a prospective study. *JAMA* **1995**; 273:117–23.
- Bone RC, Grodzin CJ, Balk RA. Sepsis: a new hypothesis for pathogenesis of the disease process. *Chest* **1997**; 112:235–43.
- Angus DC, Wax RS. Epidemiology of sepsis: an update. *Crit Care Med* **2001**; 29(Suppl 7):S109–16.
- Mira JP, Cariou A, Grall F, et al. Association of TNF2, a TNF-alpha promoter polymorphism, with septic shock susceptibility and mortality: a multicenter study. *JAMA* **1999**; 282:561–8.
- Arnalich F, Lopez-Maderuelo D, Codoceo R, et al. Interleukin-1 receptor antagonist gene polymorphism and mortality in patients with severe sepsis. *Clin Exp Immunol* **2002**; 127:331–6.
- Westendorp RG, Hottenga JJ, Slagboom PE. Variation in plasminogen-activator-inhibitor-1 gene and risk of meningococcal septic shock. *Lancet* **1999**; 354:561–3.
- Hermans PW, Hibberd ML, Booy R, et al. 4G/5G promoter polymorphism in the plasminogen-activator-inhibitor-1 gene and outcome of meningococcal disease. Meningococcal Research Group. *Lancet* **1999**; 354:556–60.
- Menges T, Hermans PW, Little SG, et al. Plasminogen-activator-inhibitor-1 4G/5G promoter polymorphism and prognosis of severely injured patients. *Lancet* **2001**; 357:1096–7.
- Turner MW, Hamvas RMJ. Mannose-binding lectin: structure, function, genetics and disease associations. *Rev Immunogenet* **2000**; 2:305–22.
- Sastry K, Herman GA, Day L, et al. The human mannose-binding protein gene: exon structure reveals its evolutionary relationship to a human pulmonary surfactant gene and localization to chromosome 10. *J Exp Med* **1989**; 170:1175–89.
- Taylor ME, Brickell PM, Craig RK, Summerfield JA. Structure and evolutionary origin of the gene encoding a human serum mannose-binding protein. *Biochem J* **1989**; 262:763–71.
- Sumiya M, Super M, Tabona P, et al. Molecular basis of opsonic defect in immunodeficient children. *Lancet* **1991**; 337:1569–70.
- Lipscombe RJ, Sumiya M, Hill AV, et al. High frequencies in African and non-African populations of independent mutations in the mannose binding protein gene. *Hum Mol Gen* **1992**; 1:709–15.
- Madsen HO, Garred P, Kurtzhals JAL, et al. A new frequent allele is the missing link in the structural polymorphism of the human mannan-binding protein. *Immunogenetics* **1994**; 40:37–44.
- Madsen HO, Garred P, Thiel S, et al. Interplay between promoter and structural gene variants control basal serum level of mannan-binding protein. *J Immunol* **1995**; 155:3013–20.
- Madsen HO, Satz ML, Høgh B, Svejgaard A, Garred P. Different molecular events result in low protein levels of mannan-binding lectin in populations from Southeast Africa and South America. *J Immunol* **1998**; 161:3169–75.
- Koch A, Melbye M, Sorensen P, et al. Acute respiratory tract infections and mannose-binding lectin insufficiency during early childhood. *JAMA* **2001**; 285:1316–21.
- Garred P, Madsen HO, Hofmann B, Svejgaard A. Increased frequency of homozygosity of abnormal mannan-binding protein alleles in patients with suspected immunodeficiency. *Lancet* **1995**; 346:941–3.
- Garred P, Madsen HO, Balslev U, et al. Susceptibility to HIV infection and progression of AIDS in relation to variant alleles of mannose-binding lectin. *Lancet* **1997**; 349:236–40.
- Garred P, Pressler T, Madsen HO, et al. Association of mannose-binding lectin gene heterogeneity with severity of lung disease and survival in cystic fibrosis. *J Clin Invest* **1999**; 104:431–7.
- Neth O, Hann I, Turner MW, Klein NJ. Deficiency of mannose-binding lectin and burden of infection in children with malignancy: a prospective study. *Lancet* **2001**; 358:614–8.
- Garred P, Voss A, Madsen HO, Junker P. Association of mannose-binding lectin gene variation with disease severity and infections in a population-based cohort of systemic lupus erythematosus patients. *Genes Immun* **2001**; 2:442–50.
- Graudal NA, Madsen HO, Tarp U, et al. The association of variant mannose-binding lectin genotypes with radiographic outcome in rheumatoid arthritis. *Arthritis Rheum* **2000**; 43:515–21.
- Bone RC, Sibbald WJ, Sprung CL. The ACCP-SCCM consensus conference on sepsis and organ failure. *Chest* **1992**; 101:1481–3.
- Le Gall JR, Lemeshow S, Saulnier F. A new Simplified Acute Physiology Score (SAPS II) based on a European/North American multicenter study. *JAMA* **1993**; 270:2957–63.
- Garred P, Madsen HO, Kurtzhals JAL, et al. Diallelic polymorphism may explain variations of blood concentration of mannan-binding protein in Eskimos, but not in black Africans. *Eur J Immunogenet* **1992**; 19:403–12.
- Aldener-Cannava A, Olerup O. HLA-DPA1 typing by PCR amplification with sequence-specific primers (PCR-SSP) and distribution of DPA1 alleles in Caucasian, African and Oriental populations. *Tissue Antigens* **1996**; 48:153–60.
- Naito H, Ikeda A, Hasegawa K, et al. Characterization of human serum mannan-binding protein promoter. *J Biochem (Tokyo)* **1999**; 126:1004–12.
- Moreno R, Apolone G. Impact of different customization strategies in the performance of a general severity score. *Crit Care Med* **1997**; 25:2001–8.

30. Knaus WA, Wagner DP, Draper EA, et al. The APACHE III prognostic system: risk prediction of hospital mortality for critically ill hospitalized adults. *Chest* **1991**; 100:1619–36.
31. Roy S, Knox K, Segal S, et al. MBL genotype and risk of invasive pneumococcal disease: a case-control study. *Lancet* **2002**; 359:1569–73.
32. Kronborg G, Weis N, Madsen HO, et al. Variant mannose-binding lectin alleles are not associated with susceptibility to and outcome of invasive pneumococcal infection in randomly included patients. *J Infect Dis* **2002**; 185:1517–20.
33. Soell M, Lett E, Holveck F, Schöller M, Wachsmann D, Klein J-P. Activation of human monocytes by streptococcal rhamnose glucose polymers is mediated by CD14 antigen and mannan binding protein inhibits TNF- $\alpha$  release. *J Immunol* **1995**; 154:851–60.
34. Jack DL, Read RC, Tenner AJ, Frosch M, Turner MW, Klein NJ. Mannose-binding lectin regulates the inflammatory response of human professional phagocytes to *Neisseria meningitidis* serogroup B. *J Infect Dis* **2001**; 184:1152–62.
35. Ogden CA, deCathelineau A, Hoffmann PR, et al. C1q and mannose binding lectin engagement of cell surface calreticulin and CD91 initiates macropinocytosis and uptake of apoptotic cells. *J Exp Med* **2001**; 194: 781–95.
36. Nauta AJ, Raaschou-Jensen N, Roos A, et al. Mannose-binding lectin engagement with late apoptotic and necrotic cells. *Eur J Immunol* **2003**; 33:2853–63.
37. Kirchfink M. Controlling the complement system in inflammation. *Immunopharmacology* **1997**; 38:51–62.
38. Czermak BJ, Sarma V, Pierson CL, et al. Protective effects of C5a blockade in sepsis. *Nat Med* **1999**; 5:788–92.
39. Garred P, Pressler T, Lanng S, et al. Mannose-binding lectin (MBL) substitution in an MBL deficient patient with severe cystic fibrosis lung disease. *Pediatr Pulmonol* **2002**; 33:201–7.
